# Supplementary material for: Gelating-induced supramolecular chirality of achiral porphyrins: chiroptical switch between achiral molecules and chiral assemblies
Source: Royal Society of Chemistry journal article supplement (doi:10.1039/b710165a), 2007-01-01
Supplement: b710165a.pdf [file b710165a.pdf]

## Supporting information

### Gelating Induced Supramolecular Chirality of Achiral Porphyrins: Chiroptical Switch between Achiral Molecules and Chiral Assemblies

Yuangang Li, Tianyu Wang and Minghua Liu\*

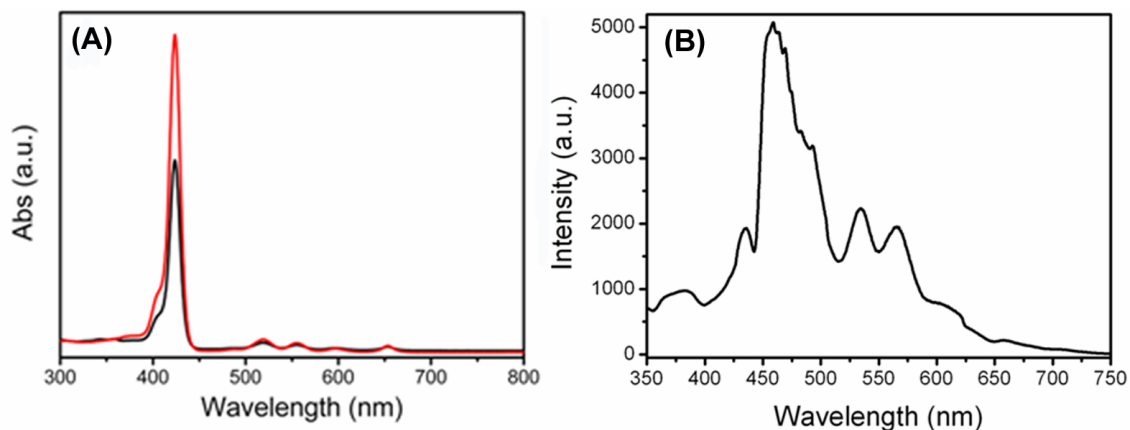

**Figure S1** UV-vis spectra of TPPOC<sub>12</sub>H<sub>25</sub> in toluene (A); the red and black line is the spectrum of TPPOC<sub>12</sub>H<sub>25</sub> solution and TPPOC<sub>12</sub>H<sub>25</sub>/L-1 gel, respectively. And RLS spectra of TPPOC<sub>12</sub>H<sub>25</sub>/L-1 gel in DMSO(B).

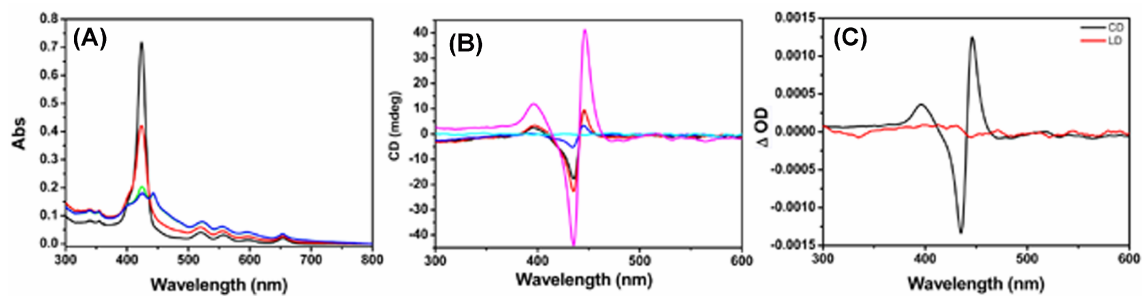

**Figure S2** UV-Vis (A) and CD (B) spectra of L-1/TPPC12H<sub>25</sub> measured at different temperatures and the LD spectrum compared with the CD spectrum measured at the same conditions

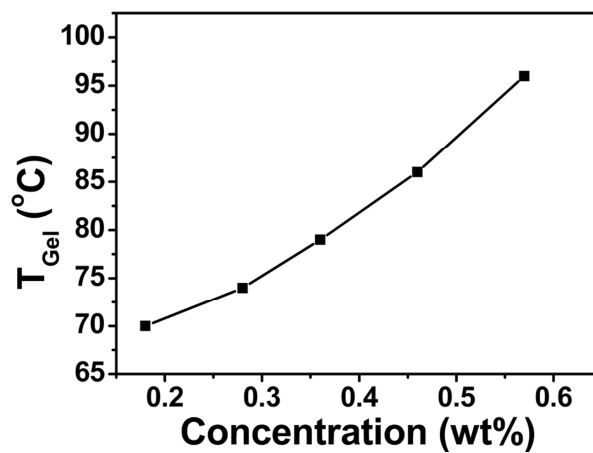

**Figure S3** The plot of the gelator concentration versus the phase transition temperature of the L-1/DMSO gel.
